# Supplementary material for: Brief communication: Rethinking the 1998 China flood to prepare for anonstationary future
Source: Copernicus journal article supplement (doi:10.5194/nhess-2018-394), 2019-01-07
Supplement: Supplementary file [file nhess-2018-394-AC4-supplement.pdf]

# Brief communication: Rethinking the 1998 China flood to prepare for a nonstationary future

Shiqiang Du<sup>1,2</sup>, Xiaotao Cheng<sup>3</sup>, Qingxu Huang<sup>4</sup>, Ruishan Chen<sup>5</sup>, Philip J. Ward<sup>2</sup>, and Jeroen C. J. H. Aerts<sup>2</sup>

5 <sup>1</sup>School of Environmental and Geographical Sciences, Shanghai Normal University, Shanghai, 200234, China

<sup>2</sup>Institute for Environmental Studies, Vrije Universiteit Amsterdam, Amsterdam, 1081 HV, The Netherlands

<sup>3</sup>China Institute of Water Resources and Hydropower Research, Beijing, 100038, China

<sup>4</sup>State Key Laboratory of Earth Surface Processes & Resource Ecology, Beijing Normal University, Beijing, 100875, China

<sup>5</sup>School of Geographic Sciences, East China Normal University, Shanghai, 200241, China

10 *Correspondence to:* Shiqiang Du ([shiqiangdu@shnu.edu.cn](mailto:shiqiangdu@shnu.edu.cn)); Jeroen C. J. H. Aerts ([jeroen.aerts@vu.nl](mailto:jeroen.aerts@vu.nl))

**Abstract.** A mega-flood in 1998 caused tremendous losses in China and triggered major policy adjustments in flood-risk management. This paper aims to retrospectively examine these policy adjustments and discuss how China should adapt to newly emerging flood challenges. We show that China suffers annually from floods, despite large-scale investments and policy adjustments. Rapid urbanization and climate change will exacerbate future flood risk in China, with cascading impacts on other countries through global trade networks. Therefore, novel flood-risk management approaches are required, such as a risk-based urban planning and coordinated water governance systems with public participation, in addition to traditional structural protection.

## 1. China's mega-flood in 1998

In 1998, a mega-flood swept through China's major river basins, including the Yangtze, Songhua, Nei, Min, and Pearl Rivers. In the Yangtze and Songhua Rivers, floodwaters exceeded historical maximum heights and overtopped 300 km of dikes, and led to 15,000 dike segments being put in an emergency state and having to be reinforced by 8 million rescuers. Nationwide, the floods affected 186 million people, caused 4,150 deaths, and led to total economic losses of US\$ 70 billion (in 2015 US\$) (MWR, 1999). Whilst the mega-flood of 1998 had particularly severe impacts, the 1990s also saw large losses. On average, economic damages from floods in the 1990s were around US\$ 40 billion per year, accounting for 2.28% of China's GDP.

25 The main drivers of the disastrous 1998 flood are considered to be land use change and poor maintenance of levees, as well as extreme weather conditions (MWR, 1999). With respect to land use change, China extensively exploits its land to feed 21% of the world's population, whilst having only 6% of the world's total water resources and 9% of the world's arable land. This has resulted in a rapid degradation of the forested upper catchments, disrupting the functioning of reservoirs through enhanced peak flows and increased soil erosion. In the middle and lower reaches, wetlands and water-bodies have been reclaimed as

polders for farmlands or fishponds. As a result, the capacity of wetlands and waterbodies to store and to convey floodwaters has declined. Furthermore, to protect polders against rising floodwaters, lakes and tributaries have been further disconnected from river channels by floodgates. For example, the lake surface area connected to the Yangtze River reduced from 17,198 km<sup>2</sup> in the 1950s to 6,000 km<sup>2</sup> in 1998 — this led to increased flood water levels in 1998 by approximately one meter (MWR, 1999). This paper aims to retrospectively examine policy adjustments taken following the 1998 floods and discuss how China should adapt to newly emerging flood challenges.

## 2. China's response to the 1998 flood

In response to the 1998 mega-flood, China adopted a series of integrated flood management policies, focusing on three major issues: 1) conserving soil and water through forest protection and reforestation; 2) returning reclaimed lands to open water and wetlands; and 3) enhancing both levee and reservoir systems to increase flood protection and control. In the years after the 1998 flood, 16 major sustainability programs were launched (Bryan et al., 2018). For instance, the Grain for Green Program (1999–2020) aims to prevent soil erosion and mitigate flooding by converting cropland and wasteland on hillslopes into natural forests and grasslands. The programs related to runoff and erosion invested a total of 114.2 billion US\$ between 1998–2015, accounting for 32.5% of the total sustainability program investment (Bryan et al., 2018). These efforts reduced soil erosion by 12.9% nationwide, 58.8% in the Yangtze river basin, and 27.0% in the Yellow river basin between 2000 and 2010 (Deng et al., 2012). Furthermore, the capacity of wetlands to temporarily store flood waters increased by 12.7% (Ouyang et al., 2016).

China also required local communities to convert polders into wetland areas and lakes for capturing floodwaters. From 1998 to 2002, 1,461 polders were removed and 2.4 million people were relocated elsewhere in the Yangtze River basin. This increased the inland water area by 2,900 km<sup>2</sup> and added a storage capacity of 13 billion m<sup>3</sup> (MWR, 2015). However, efforts to restore and protect open waters, such as lakes and ponds, deteriorated over time, and by 2015 there were still 406 polders in the main channels of Yangtze River and 133 polders in the Dongting- and Poyang lake regions, with a total population of 1.9 million (MWR, 2015). Nationwide, the population living in floodplains increased by 1.1% per year over the period 1990–2015, which is much faster than the population growth outside floodplains (0.4% per year) (Fang et al., 2018).

The impact of the 1998 floods also led to a new flood protection program. China invested a total of US\$ 294 billion on technical protection during 1998–2017, accounting for more than a third of total investments in water engineering, which also include water supply and hydropower generation (Fig. 1). As a result, the lengths of the river banks protected by well-maintained dikes increased from 76,532 km in 1998 to 201,124 km in 2016, and reservoir capacity increased from 493 trillion to 897 trillion m<sup>3</sup> (MWR, 2017). An example of the latter is the well-known Three Gorges Dam, which was completed in 2006 and has a capacity of 39.3 billion m<sup>3</sup>. At Jingzhou, a weak point in the Yangtze river downstream from the dam, the protection standard was increased from a 10-year- to a 100-year flood (Mei, 2010).

Finally, China has also made huge efforts to improve evacuation. In the 2010s, China evacuated an average of 9.9 million people per year and called in 10.8 million rescuers for emergencies. For example, 190,000 people were evacuated in Shanghai for Typhoon Anbi on July 22th, 2018.

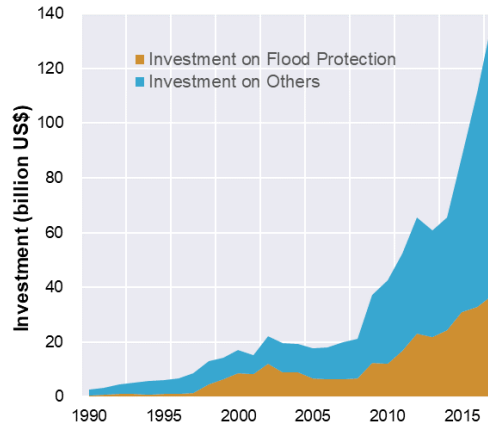

5

**Figure 1:** Investment in flood protection and other water engineering programs (e.g. water supply and hydropower) in China (in 2015 US\$; data source: MWR, 2017)

### 3. Societal effects of response measures after 1998

10 The flood management efforts taken after the 1998 flood initially decreased the annual flood fatalities from 3909 in the 1990s to 1454 in the 2000s, but the number levelled off at 1134 in the 2010s (Fig 2 a). Medium- and small-size basins disproportionately suffer flood fatalities, with 15,662 deaths in the 2010s (72.6% of the total flood fatalities in China) (MWR, 2017). For instance, a local-scale catastrophe in Zhouqu, western China, led to 1765 fatalities on August 8th, 2010, marking 2010 as the worst year since 1998 in terms of flood fatalities.

15 Furthermore, despite the large investments in flood management, flood damages reached a new peak during the 2010s (Lyu et al., 2018b), with US\$ 41.1 billion per year. This exceeds the long-term average annual damage of US\$ 24–39 billion in the 1990–2000s (in 2015 US\$; Fig 2b). While the ratio of economic losses from flooding to GDP decreased from 2.3% in the 1990s to 0.6% in the 2000s, and to 0.4% in the 2010s, the current loss ratio (0.4%) is much larger than in high-income countries (e.g. <0.05% in the USA (Roger Pielke, 2015)). Floods have annually hit about 157 cities since 2006, and this number is 20 increasing. Flood events in highly urbanized areas have caused large indirect economic ripple effects and there are recent examples of paralyzed cities in China due to flood impacts on critical infrastructure (Lyu et al., 2018a). In recent years, this has interrupted ~40,000 factories per year, affected electricity supply ~20,000 times, and shut down 166 airports and seaports (MWR, 2017).

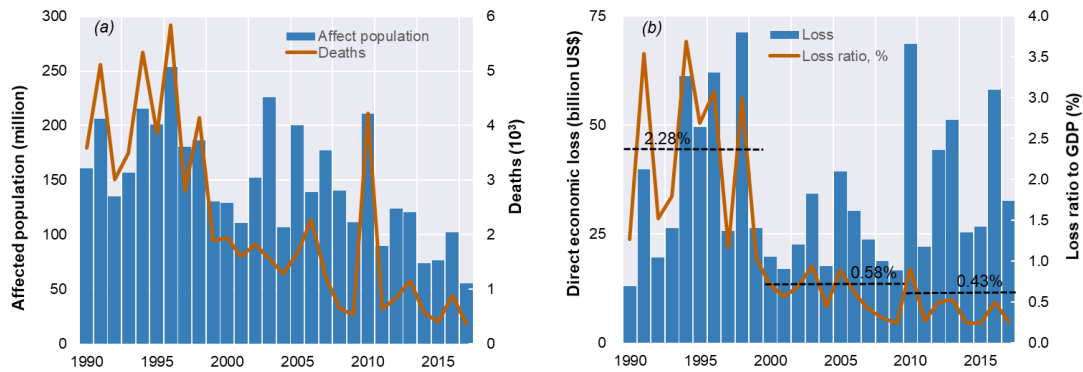

**Figure 2:** Flood fatalities (a) and flood losses (b, in 2015 US\$) in China from 1990–2017 (Data source: MWR, 2017)

#### 4. Future challenges to flood management in China

It is expected that future urbanization and climate change will further increase economic flood damage by 263%–331% in the Yangtze river basin from 2010 to 2080 (Winsemius et al., 2016). For China as a whole, it is expected that economic production losses from floods will increase more rapidly than other countries (Willner et al., 2018). If the world’s second largest economy continues suffering huge flood damages, the impacts could be felt worldwide and may hamper the global economy. During 2016–2035, China is expected to suffer two-thirds of the global direct production losses caused by floods, totalling US\$389 billion, which can further propagate an indirect impact of about US\$300 billion to other countries through the global trade and supply network (Willner et al., 2018).

10

Flood management in China, and in particular in urban areas, could be better prepared for these future challenges. Urbanization in Chinese floodplains continues to increase, and 80.0% of China’s total population is projected to live in cities by 2050, which represents an increase from 33.5% in 1998 and 55.5% in 2015. Urban land in floodplains has expanded at a rate of 1,210 km<sup>2</sup>/year between 1998–2015, and is expected to increase by another 16,900 km<sup>2</sup> by 2050 (Du et al., 2018). These numbers will probably be even higher due to the ending of the ‘one-child’ policy.

15

Another challenge is to ensure that flood protection standards keep up with the rate of urbanization and climate change. A survey in 2013 showed that 50% (or 321) of the 642 Chinese cities did not reach the required flood protection standards and that 44% (or 284) of the cities did not complete or update flood management plans (Fang et al., 2018). This especially holds for cities in the semi-arid north-western part of China, which have a slower economic development and generally limited flood protection. However, many of those cities are rapidly growing in the floodplains (Du et al., 2018; Fang et al., 2018) and are expected to experience increasing extreme precipitation events (Zhou et al., 2014). The floods in Lanzhou, Ningxia, and Xining in 2017 and 2018 are wakeup calls about rising flood risk in this area.

20

## 5. Future adaptation

Novel flood adaptation policies are required to address these (uncertain-) future challenges. Such policies should be based on a well-established and up-to-date risk assessment, which accounts for future changes in climate and socioeconomic conditions. One component of the new policies could be enhanced flood protection systems, especially in urban areas with high economic values and large exposed populations (Ward et al., 2017). However, structural measures can also release the ‘levee effect’, further stimulating exposure in protected areas. Hence, additional measures and regulations are required to solve this paradox between urban development and structural protection, to sustain and enhance environmental values, and to reduce flood risk in areas where dikes are not cost-effective.

10 *Integrate flood management into urban planning:* The 1998 floods triggered a large scale conversion of farmlands and settlements to wetlands and inland water areas, which was unprecedented in this populous country. However, the awareness gained in the aftermath of the 1998 catastrophe seems to be dissipating over time: cities are again reclaiming lands from natural floodplains and urban exposure is again rising in vulnerable areas (Lyu et al., 2018b). New spatial planning policies, such as zoning and building codes, could be developed and reinforced to reduce local flood risk, involving households and communities. In addition, the importance of ecosystems and ‘nature based solutions’ should be increasingly acknowledged in reducing flood risk (Lyu et al., 2018b). For this latter aspect, China has nominated 1,060,000 ‘river chiefs’ to protect the natural processes of storing and discharging flood waters from expanding cities. Balancing the huge development pressure and restoring spaces for floodwaters is a challenge, but is critical for integrating flood management into urban planning (Opperman et al., 2009).

20

*Strengthen governance and coordination:* Another challenge is to improve the development of integrated flood risk management plans and designs, preferably involving all responsible stakeholders (Aerts et al., 2014). However, flood risk management in China is still characterized by a top-down administration that is divided in different governmental organizations. At national level, for instance, dike design and maintenance is the responsibility of the MWR, wetland protection is managed by the Ministry of Ecology and Environment, the land use master plan falls within the realm of the Ministry of Land and Resources, and the urban-oriented ‘Sponge City’ program is coordinated by the Ministry of Housing and Urban-Rural Development. In this multi-jurisdiction setting, a new governance structure is needed to effectively coordinate water-soil conservation, wetland protection, dike design, and urban planning for reducing flood risk (Cheng et al., 2018). Such a new governance system should address decentralized governance approaches, involving the heterogeneities of China’s communities. Furthermore, attention should be paid to resolve upstream and downstream conflicts and differences in protection levels between urban- and rural areas (Cheng et al., 2018).

30

*Improve information sharing and public participation:* Flood risk information for the public is currently scarce in China. Flood hazard maps were produced during 2011–2016, and China plans to invest in high resolution flood information, for example from remote sensing. The sharing of flood risk information, as recommended by the UNISDR Sendai Framework, facilitates public participation and stimulates a “bottom-up” process to raise awareness and promote local action for flood adaptation (Haer et al., 2019). In addition, the information on the cost and benefit of wet/dry flood-proofing buildings and other flood adaptation measures must be improved, to demonstrate what local stakeholders can do themselves in terms of flood adaptation. Public participation can also support policy makers in developing adaptation measures that have support from the public.

*Acknowledgements.* This research was funded by the National Natural Science Foundation of China (Grant Nos. 41871200, 41730642, 51761135024) and the National Key Research and Development Program of China (2017YFC1503001). We are grateful to Prof. Anders Levermann at Potsdam Institute for Climate Impact Research, Germany for providing the propagation effect of China's production loss to the rest world.

*Author contribution.* Shiqiang Du designed this study and collected the needed information. Shiqiang Du and Jeroen C. J. H. Aerts prepared the manuscript with contributions from all co-authors.

*Competing interests.* The authors declare that they have no conflict of interest.

## References

- Aerts, J., Botzen, W. J. W., Emanuel, K., et al.: Evaluating Flood Resilience Strategies for Coastal Megacities, *Science*, 344, 472-474, 2014.
- Bryan, B. A., Gao, L., Ye, Y., et al.: China's response to a national land-system sustainability emergency, *Nature*, 559, 193-204, 2018.
- Cheng, X., Wan, H., Huang, S., et al.: Lessons Learned from the 2016 Yangtze River Flood in Anhui Province, China, *International Journal of River Basin Management*, doi: 10.1080/15715124.2018.1437741, 2018. 1-16, 2018.
- Deng, L., Shangguan, Z.-p., and Li, R.: Effects of the grain-for-green program on soil erosion in China, *International Journal of Sediment Research*, 27, 120-127, 2012.
- Du, S., He, C., Huang, Q., et al.: How did the urban land in floodplains distribute and expand in China from 1992–2015?, *Environ Res Lett*, 13, 034018, 2018.
- Fang, Y., Du, S., Scussolini, P., et al.: Rapid Population Growth in Chinese Floodplains from 1990 to 2015, *Int J Env Res Pub He*, 15, 1602, 2018.
- Haer, T., Botzen, W. J. W., and Aerts, J. C.: Advancing disaster policies by integrating dynamic adaptive behaviour in risk assessments using an agent-based modelling approach, *Environ Res Lett*, 2019. 2019.
- Lyu, H.-M., Sun, W.-J., Shen, S.-L., et al.: Flood risk assessment in metro systems of mega-cities using a GIS-based modeling approach, *Science of The Total Environment*, 626, 1012-1025, 2018a.
- Lyu, H.-M., Xu, Y.-S., Cheng, W.-C., et al.: Flooding Hazards across Southern China and Prospective Sustainability Measures, *Sustainability*, 10, 1682, 2018b.
- Mei, J.: Flood control planning and construction in China (in Chinese), *China Water Resources*, 2010. 17-19, 2010.
- MWR: The 1998 China Flood, China Water Power Press, Beijing, 1999.
- MWR: China Water Statistical Yearbook 2017, China Water Power Press, Beijing, 2017.
- MWR: Flood prevention plan of Yangtze River, Ministry of Water Resources, Beijing, 2015.
- Opperman, J. J., Galloway, G. E., Fargione, J., et al.: Sustainable Floodplains Through Large-Scale Reconnection to Rivers, *Science*, 326, 1487-1488, 2009.
- Ouyang, Z., Zheng, H., Xiao, Y., et al.: Improvements in ecosystem services from investments in natural capital, *Science*, 352, 1455-1459, 2016.
- Roger Pielke, J.: <https://theclimatefix.wordpress.com/2015/02/05/the-precipitous-decline-in-us-flood-damage-as-a-percentage-of-gdp/>, last access: Oct. 10 2018.
- Ward, P. J., Jongman, B., Aerts, J. C. J. H., et al.: A global framework for future costs and benefits of river-flood protection in urban areas, *Nature Clim. Change*, 7, 642-646, 2017.
- Willner, S. N., Otto, C., and Levermann, A.: Global economic response to river floods, *Nature Climate Change*, 8, 594-598, 2018.
- Winsemius, H. C., Aerts, J. C. J. H., van Beek, L. P. H., et al.: Global drivers of future river flood risk, *Nature Clim. Change*, 6, 381-385, 2016.
